# Supplementary material for: Genome-wide development of transposable elements-based markers in foxtail millet and construction of an integrated database
Source: PubMed Central journal article supplement (PMC4379977; doi:10.1093/dnares/dsu039), 2014-11-26
Supplement: supp_dsu039_dsu039supp.pdf [file supp_dsu039_dsu039supp.pdf]

## **Supplementary materials**

**Supplementary Figure S1:** Distribution of full length LTR-type retrotransposons across the nine chromosomes of foxtail millet.

**Supplementary Figure S2:** Genome-wide prediction of Full length LTR retrotransposon from foxtail genome using LTR finder software.

**Supplementary Figure S3:** BLAST analysis showing unique junction region for designing the junction based primer.

**Supplementary Figure S4:** BLAST analysis showing repetitive region in the sequence (highlighted red in color) to demarcate the junction site. Arrow shows one primer from junction site and other primer from other region of the sequence.

**Supplementary Figure S5:** PCR amplification profile of Repeat Junction Marker (a) dna13398, (b) dna16027, (c) dna19096 and (d) LINE2650. The detailed information for 24 accessions (SN. 25-48) of *Setaria italica* are listed in Supplementary Table S1.

**Supplementary Figure S6:** Multiple sequence alignment of 88 accessions of *Setaria italica* accessions along with reference genome amplified with LINE2650 primer. The detailed information for 88 accessions of *Setaria italica* are listed in Supplementary Table S1.

**Supplementary Figure S7:** Multiple sequence alignment of 11 accessions of *Setaria italica* accessions along with reference genome amplified with RJM7 primer. The detailed information for 11 accessions (RJM07:reference genome; IC480117, IC403579, cv. Prasad, cv. Lepakshi, IC403476, GS464, IC404178, IC403521, EC539248, EC539291) of *Setaria italica* are listed in Supplementary Table S1.

**Supplementary Figure S8:** Distribution of different types of nested TE subclasses.

**Supplementary Figure S9:** An un-rooted neighbor-joining tree for the 99 individuals of *Setaria italica* alongwith three wild species.

**Supplementary Figure S10:** Graphical representation showed the detection of the true number of groups  $K^*$  resulted after structure analysis.

**Supplementary Figure S11:** Bar plot of *Setaria italica* of 99 accessions were generated by STRUCTURE 2.3.4 using the admixture model with correlated allele frequencies. Groups are represented by colours.

**Supplementary Figure S12:** Tutorial of Foxtail millet Transposable Element-based Marker Database.

**Supplementary Table S1:** List of plant materials used in the present study

**Supplementary Table S2:** Details of *Copia*-type retrotransposons identified in foxtail millet

**Supplementary Table S3:** Details of *Gypsy*-type retrotransposons identified in foxtail millet

**Supplementary Table S4:** Details of partially or solo *Copia*-type retrotransposons identified in foxtail millet

- Supplementary Table S5:** Details of partially or solo *Gypsy*-type retrotransposons identified in foxtail millet
- Supplementary Table S6:** Details of *LINEs* (Non-LTR type) identified in foxtail millet
- Supplementary Table S7:** Details of *SINEs* (Non-LTR type) identified in foxtail millet
- Supplementary Table S8:** Estimation of insertion time of *Copia*-type transposable elements
- Supplementary Table S9:** Estimation of insertion time of *Gypsy*-type transposable elements
- Supplementary Table S10:** Details of DNA transposons identified in foxtail millet
- Supplementary Table S11:** Presence of transcriptionally active *Copia*-type retrotransposons in various tissues of foxtail millet
- Supplementary Table S12:** Presence of transcriptionally active *Gypsy*-type retrotransposons in various tissues of foxtail millet
- Supplementary Table S13:** Presence of transcriptionally active non-LTR type retrotransposons (LINE) in various tissues of foxtail millet
- Supplementary Table S14:** Presence of transcriptionally active non-LTR type retrotransposons (SINE) in various tissues of foxtail millet
- Supplementary Table S15:** Presence of transcriptionally active DNA transposons in various tissues of foxtail millet
- Supplementary Table S16:** Details of RBIP primers designed in foxtail millet
- Supplementary Table S17:** Details of IRAP primers designed in foxtail millet
- Supplementary Table S18:** Details of RJM primers designed in foxtail millet
- Supplementary Table S19:** Details of RJJM primers designed in foxtail millet
- Supplementary Table S20:** Details of ISBP primers designed in foxtail millet
- Supplementary Table S21:** Details of REMAP primers designed in foxtail millet
- Supplementary Table S22:** Primer sequences of 134 transposable elements junction based markers validated in foxtail millet
- Supplementary Table S23:** The raw STRUCTURE output used for determination of true number of K
- Supplementary Table S24:** Determination of K using Evanno's method
- Supplementary Table S25:** Summary of distribution of pure ancestral *Setaria italica* individuals
- Supplementary Table S26:** Syntenic relationships between transposable elements of foxtail millet and sorghum
- Supplementary Table S27:** Syntenic relationships between transposable elements of foxtail millet and maize
- Supplementary Table S28:** Syntenic relationships between transposable elements of foxtail millet and rice
- Supplementary Table S29:** Syntenic relationships between transposable elements of foxtail millet and *Brachypodium*

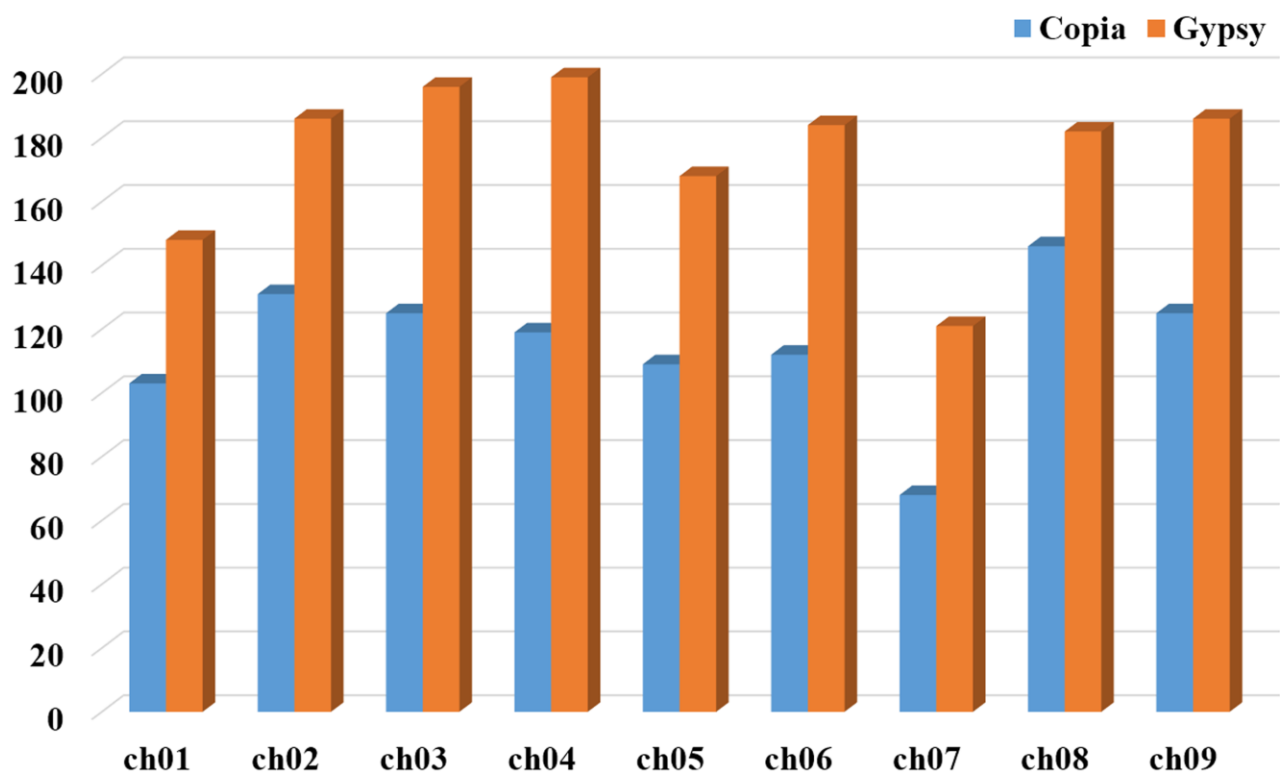



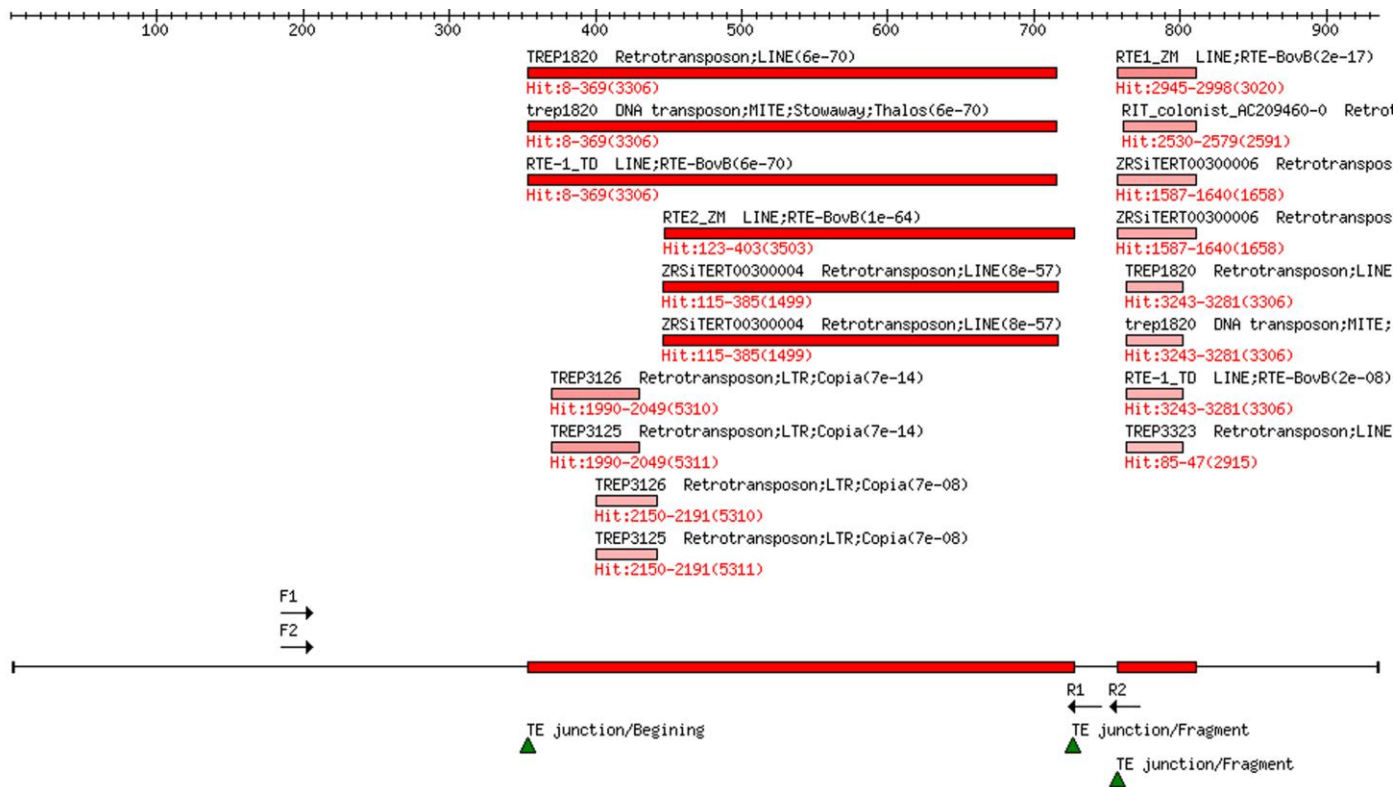



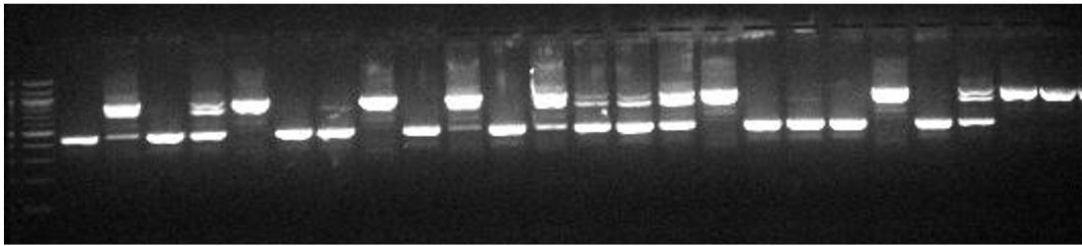

**(a) dna13398**

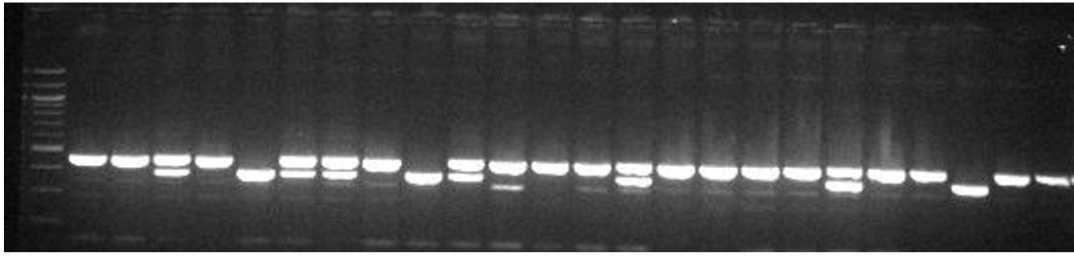

**(b) dna16027**

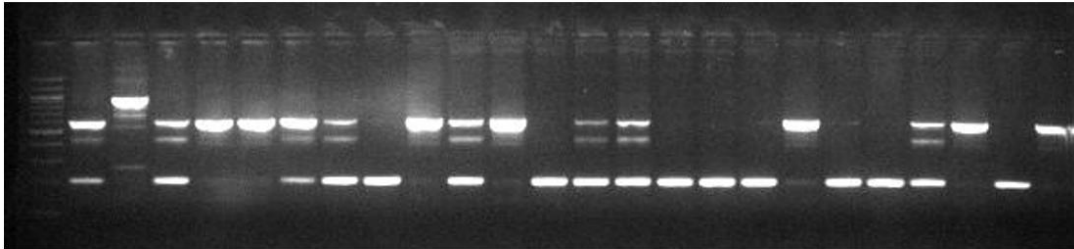

**(c) dna19096**

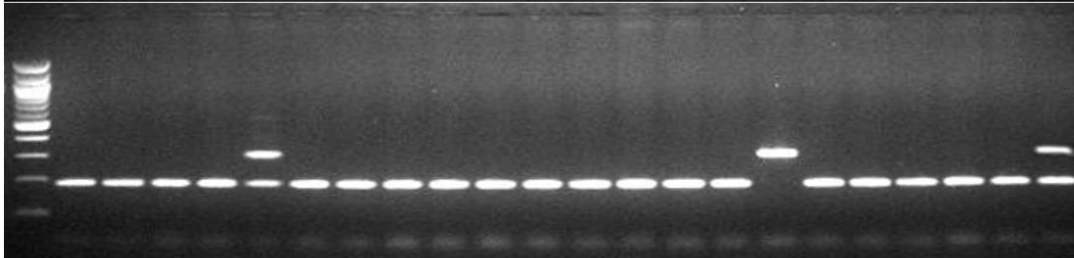

**(d) LINE2650**





```

RIM07      1  TGCATGCTCTCCACACCCACCAACCATATCAAAAAGCCCAACAAAAGATTCCGATAGGACTGTAGAACTAGCTACTGCTGTTAAATGCTTTCTGGGAATATTAGTTTCTATTAAGTGCTGCTAGATTATATATAGATTATTATGAACCTACCTAGCTGCTCAGATAGCA191
IC480117   1  TGCATGCTCTCCACACCCACCAACCATATCAAAAAGCCCAACAAAAGATTCCGATAGGACTGTAGAACTAGCTACTGCTGTTAAATGCTTTCTGGGAATATTAGTTTCTATTAAGTGCTGCTAGATTATATATAGATTATTATGAACCTACCTAGCTGCTCAGATAGCA191
IC403579   1  TGCATGCTCTCCACACCCACCAACCATATCAAAAAGCCCAACAAAAGATTCCGATAGGACTGTAGAACTAGCTACTGCTGTTAAATGCTTTCTGGGAATATTAGTTTCTATTAAGTGCTGCTAGATTATATATAGATTATTATGAACCTACCTAGCTGCTCAGATAGCA191
cv. Prasad 1  TGCATGCTCTCCACACCCACCAACCATATCAAAAAGCCCAACAAAAGATTCCGATAGGACTGTAGAACTAGCTACTGCTGTTAAATGCTTTCTGGGAATATTAGTTTCTATTAAGTGCTGCTAGATTATATATAGATTATTATGAACCTACCTAGCTGCTCAGATAGCA191
cv. Lepakshi 1  TGCATGCTCTCCACACCCACCAACCATATCAAAAAGCCCAACAAAAGATTCCGATAGGACTGTAGAACTAGCTACTGCTGTTAAATGCTTTCTGGGAATATTAGTTTCTATTAAGTGCTGCTAGATTATATATAGATTATTATGAACCTACCTAGCTGCTCAGATAGCA191
IC403476   1  TGCATGCTCTCCACACCCACCAACCATATCAAAAAGCCCAACAAAAGATTCCGATAGGACTGTAGAACTAGCTACTGCTGTTAAATGCTTTCTGGGAATATTAGTTTCTATTAAGTGCTGCTAGATTATATATAGATTATTATGAACCTACCTAGCTGCTCAGATAGCA191
GS464      1  TGCATGCTCTCCACACCCACCAACCATATCAAAAAGCCCAACAAAAGATTCCGATAGGACTGTAGAACTAGCTACTGCTGTTAAATGCTTTCTGGGAATATTAGTTTCTATTAAGTGCTGCTAGATTATATATAGATTATTATGAACCTACCTAGCTGCTCAGATAGCA191
IC404178   1  TGCATGCTCTCCACACCCACCAACCATATCAAAAAGCCCAACAAAAGATTCCGATAGGACTGTAGAACTAGCTACTGCTGTTAAATGCTTTCTGGGAATATTAGTTTCTATTAAGTGCTGCTAGATTATATATAGATTATTATGAACCTACCTAGCTGCTCAGATAGCA191
IC403521   1  TGCATGCTCTCCACACCCACCAACCATATCAAAAAGCCCAACAAAAGATTCCGATAGGACTGTAGAACTAGCTACTGCTGTTAAATGCTTTCTGGGAATATTAGTTTCTATTAAGTGCTGCTAGATTATATATAGATTATTATGAACCTACCTAGCTGCTCAGATAGCA191
EC539248   1  TGCATGCTCTCCACACCCACCAACCATATCAAAAAGCCCAACAAAAGATTCCGATAGGACTGTAGAACTAGCTACTGCTGTTAAATGCTTTCTGGGAATATTAGTTTCTATTAAGTGCTGCTAGATTATATATAGATTATTATGAACCTACCTAGCTGCTCAGATAGCA191
EC539291   1  TGCATGCTCTCCACACCCACCAACCATATCAAAAAGCCCAACAAAAGATTCCGATAGGACTGTAGAACTAGCTACTGCTGTTAAATGCTTTCTGGGAATATTAGTTTCTATTAAGTGCTGCTAGATTATATATAGATTATTATGAACCTACCTAGCTGCTCAGATAGCA191

RIM07      192  GGCCTCAAGCCCTGGTAAAGGAGGAGGCTTGTGATAGGCTTGGTGAAGCCAACTTAAACAGCCATTGAAAGGAGATGAAACCCAAAGAGAAATCCGTTGGGGCTCAACCCCTTAGC-----GACCGGCCA-----TATCGGAACCCCGTATGGGTCTAAAGGGCCAAAGGGCC357
IC480117   162  CTTTCCCCTGCCCCTGAAAAGAGAGGAGGTTTCAAAGAGGGCCGCCCTTAAAAGGTTAAAC-----CCGACACGGATTACG666GTCACCCCTATTAAGGGGCTTGGTTAACCTTGGGCTACCAACCCATACACACCCACCCCTTAAACAGGCGCTTGGAAAC329
IC403579   192  GGCCTCAAGCCCTGGTAAAGGAGGAGGCTTGTGATAGGCTTGGTGAAGCCAACTTAAACAGCCATTGAAAGGAGATGAAACCCAAAGAGAAATCCGTTGGGGCTCAACCCCTTAGC-----GACCGGCCA-----TATCGGAACCCCGTATGGGTCTAAAGGGCCAAAGGGCC357
cv. Prasad 192  GGCCTCAAGCCCTGGTAAAGGAGGAGGCTTGTGATAGGCTTGGTGAAGCCAACTTAAACAGCCATTGAAAGGAGATGAAACCCAAAGAGAAATCCGTTGGGGCTCAACCCCTTAGC-----GACCGGCCA-----TATCGGAACCCCGTATGGGTCTAAAGGGCCAAAGGGCC357
cv. Lepakshi 192  GGCCTCAAGCCCTGGTAAAGGAGGAGGCTTGTGATAGGCTTGGTGAAGCCAACTTAAACAGCCATTGAAAGGAGATGAAACCCAAAGAGAAATCCGTTGGGGCTCAACCCCTTAGC-----GACCGGCCA-----TATCGGAACCCCGTATGGGTCTAAAGGGCCAAAGGGCC357
IC403476   164  GGCCTCAAGCCCTGGTAAAGGAGGAGGCTTGTGATAGGCTTGGTGAAGCCAACTTAAACAGCCATTGAAAGGAGATGAAACCCAAAGAGAAATCCGTTGGGGCTCAACCCCTTAGC-----GACCGGCCA-----TATCGGAACCCCGTATGGGTCTAAAGGGCCAAAGGGCC329
GS464      164  GGCCTCAAGCCCTGGTAAAGGAGGAGGCTTGTGATAGGCTTGGTGAAGCCAACTTAAACAGCCATTGAAAGGAGATGAAACCCAAAGAGAAATCCGTTGGGGCTCAACCCCTTAGC-----GACCGGCCA-----TATCGGAACCCCGTATGGGTCTAAAGGGCCAAAGGGCC329
IC404178   160  GGCCTCAAGCCCTGGTAAAGGAGGAGGCTTGTGATAGGCTTGGTGAAGCCAACTTAAACAGCCATTGAAAGGAGATGAAACCCAAAGAGAAATCCGTTGGGGCTCAACCCCTTAGC-----GACCGGCCA-----TATCGGAACCCCGTATGGGTCTAAAGGGCCAAAGGGCC325
IC403521   164  GGCCTCAAGCCCTGGTAAAGGAGGAGGCTTGTGATAGGCTTGGTGAAGCCAACTTAAACAGCCATTGAAAGGAGATGAAACCCAAAGAGAAATCCGTTGGGGCTCAACCCCTTAGC-----GACCGGCCA-----TATCGGAACCCCGTATGGGTCTAAAGGGCCAAAGGGCC329
EC539248   161  GGCCTCAAGCCCTGGTAAAGGAGGAGGCTTGTGATAGGCTTGGTGAAGCCAACTTAAACAGCCATTGAAAGGAGATGAAACCCAAAGAGAAATCCGTTGGGGCTCAACCCCTTAGC-----GACCGGCCA-----TATCGGAACCCCGTATGGGTCTAAAGGGCCAAAGGGCC326
EC539291   160  GGCCTCAAGCCCTGGTAAAGGAGGAGGCTTGTGATAGGCTTGGTGAAGCCAACTTAAACAGCCATTGAAAGGAGATGAAACCCAAAGAGAAATCCGTTGGGGCTCAACCCCTTAGC-----GACCGGCCA-----TATCGGAACCCCGTATGGGTCTAAAGGGCCAAAGGGCC324

RIM07      388  GGCCTCCTCT-----CCGCCCTGGTGAAGCCCTGGT-----GCGCTTGTGAAAGGAGGCTCAAA-----GAGCAAGGATGGGGCTGATTTCTCA-----GCGGAGACTACATCGAGGCCCGG-----GTAGTGAAGAAATGAGCAAG-----GGCTTCACATCTCTCCACAGGG509
IC480117   390  GGCCTCCTCTGAAAGAAAGCCGAGTAAAGCTTCT-----GAAAATCTGAAAGAAATAGCTGGCCCAACCCCTTAAAGAAAGCC-----TAAAGAAATTCGCA-----AAGAAAGCCCTTTCACCCCTT-----TAAATCAAAAATGCAAA-----GCACTCTTTTGGGCTTGAAGCAATGT504
IC403579   388  GGCCTCCTCT-----CCGCCCTGGTGAAGCCCTGGT-----GCGCTTGTGAAAGGAGGCTCAAA-----GAGCAAGGATGGGGCTGATTTCTCA-----GAGGCGACTACATCGAGGCCCGG-----GTAGTGAAGAAATGAGCAAG-----GGCTTCACATCTCTCCACAGGG509
cv. Prasad 388  GGCCTCCTCT-----CCGCCCTGGTGAAGCCCTGGT-----GCGCTTGTGAAAGGAGGCTCAAA-----GAGCAAGGATGGGGCTGATTTCTCA-----GAGGCGACTACATCGAGGCCCGG-----GTAGTGAAGAAATGAGCAAG-----GGCTTCACATCTCTCCACAGGG489
cv. Lepakshi 388  GGCCTCCTCT-----CCGCCCTGGTGAAGCCCTGGT-----GCGCTTGTGAAAGGAGGCTCAAA-----GAGCAAGGATGGGGCTGATTTCTCA-----GAGGCGACTACATCGAGGCCCGG-----GTAGTGAAGAAATGAGCAAG-----GGCTTCACATCTCTCCACAGGG493
IC403476   390  GGCCTCCTCT-----CCGCCCTGGTGAAGCCCTGGT-----GCGCTTGTGAAAGGAGGCTCAAA-----GAGCAAGGATGGGGCTGATTTCTCA-----GAGGCGACTACATCGAGGCCCGG-----GTAGTGAAGAAATGAGCAAG-----GGCTTCACATCTCTCCACAGGG481
GS464      390  GGCCTCCTCT-----CCGCCCTGGTGAAGCCCTGGT-----GCGCTTGTGAAAGGAGGCTCAAA-----GAGCAAGGATGGGGCTGATTTCTCA-----GAGGCGACTACATCGAGGCCCGG-----GTAGTGAAGAAATGAGCAAG-----GGCTTCACATCTCTCCACAGGG474
IC404178   326  GGCCTCCTCT-----CCGCCCTGGTGAAGCCCTGGT-----GCGCTTGTGAAAGGAGGCTCAAA-----GAGCAAGGATGGGGCTGATTTCTCA-----GAGGCGACTACATCGAGGCCCGG-----GTAGTGAAGAAATGAGCAAG-----GGCTTCACATCTCTCCACAGGG470
IC403521   390  GGCCTCCTCT-----CCGCCCTGGTGAAGCCCTGGT-----GCGCTTGTGAAAGGAGGCTCAAA-----GAGCAAGGATGGGGCTGATTTCTCA-----GAGGCGACTACATCGAGGCCCGG-----GTAGTGAAGAAATGAGCAAG-----GGCTTCACATCTCTCCACAGGG481
EC539248   327  GGCCTCCTCT-----CCGCCCTGGTGAAGCCCTGGT-----GCGCTTGTGAAAGGAGGCTCAAA-----GAGCAAGGATGGGGCTGATTTCTCA-----GAGGCGACTACATCGAGGCCCGG-----GTAGTGAAGAAATGAGCAAG-----GGCTTCACATCTCTCCACAGGG491
EC539291   325  TTAATATCT-----CCGCCCTGGTGAAGCCCTGGT-----GCGCTTGTGAAAGGAGGCTCAAA-----GAGCAAGGATGGGGCTGATTTCTCA-----GAGGCGACTACATCGAGGCCCGG-----GTAGTGAAGAAATGAGCAAG-----GGCTTCACATCTCTCCACAGGG496

RIM07      510  TCCAAAGG-----TCAAGGAAGCTACGCAACCACTAGTATTTCGCCAACCCTGA-----TTTGGGCTCA-----TGTGGGTTCA-----
IC480117   505  GGGGGGG-----TCAAGGAAGCTACGCAACCACTAGTATTTCGCCAACCCTGA-----TTTGGGCTCA-----TGTGGGTTCA-----
IC403579   510  TCCAAAGG-----TCAAGGAAGCTACGCAACCACTAGTATTTCGCCAACCCTGA-----TTTGGGCTCA-----TGTGGGTTCA-----
cv. Prasad 494  -----TCAAGGAAGCTACGCAACCACTAGTATTTCGCCAACCCTGA-----TTTGGGCTCA-----TGTGGGTTCA-----
cv. Lepakshi 494  -----TCAAGGAAGCTACGCAACCACTAGTATTTCGCCAACCCTGA-----TTTGGGCTCA-----TGTGGGTTCA-----
IC403476   482  TCTAATG-----TTCTGGAATCTACGCAACTACTTTCAGCTGCTTGGCCCTGCTTGGGGCTTGAAGTGCCTCAAGTCTCTCCCTTTGGGCTCA-----TGTGGGTTCA-----
GS464      475  -----TCAAGGAAGCTACGCAACCACTAGTATTTCGCCAACCCTGA-----TTTGGGCTCA-----TGTGGGTTCA-----
IC404178   471  -----TCAAGGAAGCTACGCAACCACTAGTATTTCGCCAACCCTGA-----TTTGGGCTCA-----TGTGGGTTCA-----
IC403521   482  TCCAAAGG-----TCAAGGAAGCTACGCAACCACTAGTATTTCGCCAACCCTGA-----TTTGGGCTCA-----TGTGGGTTCA-----
EC539248   492  GGAAGGGGCTCCCTCACCACCAAAAGCAACCCATTATGATACCTTACCTTACTCTAAAG-----CCTTACAAACCC-----CTTACCCCTGCT-----
EC539291   497  GGGGGGGGG-----TCAAGGAAGCTACGCAACCACTAGTATTTCGCCAACCCTGA-----TTTGGGCTCA-----TGTGGGTTCA-----

```

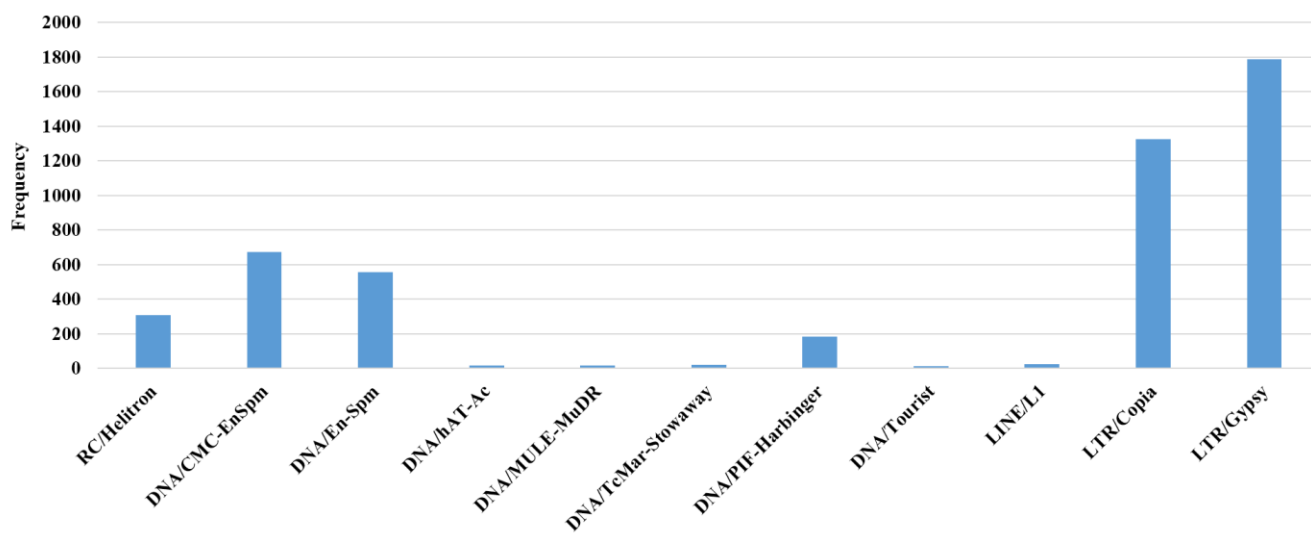

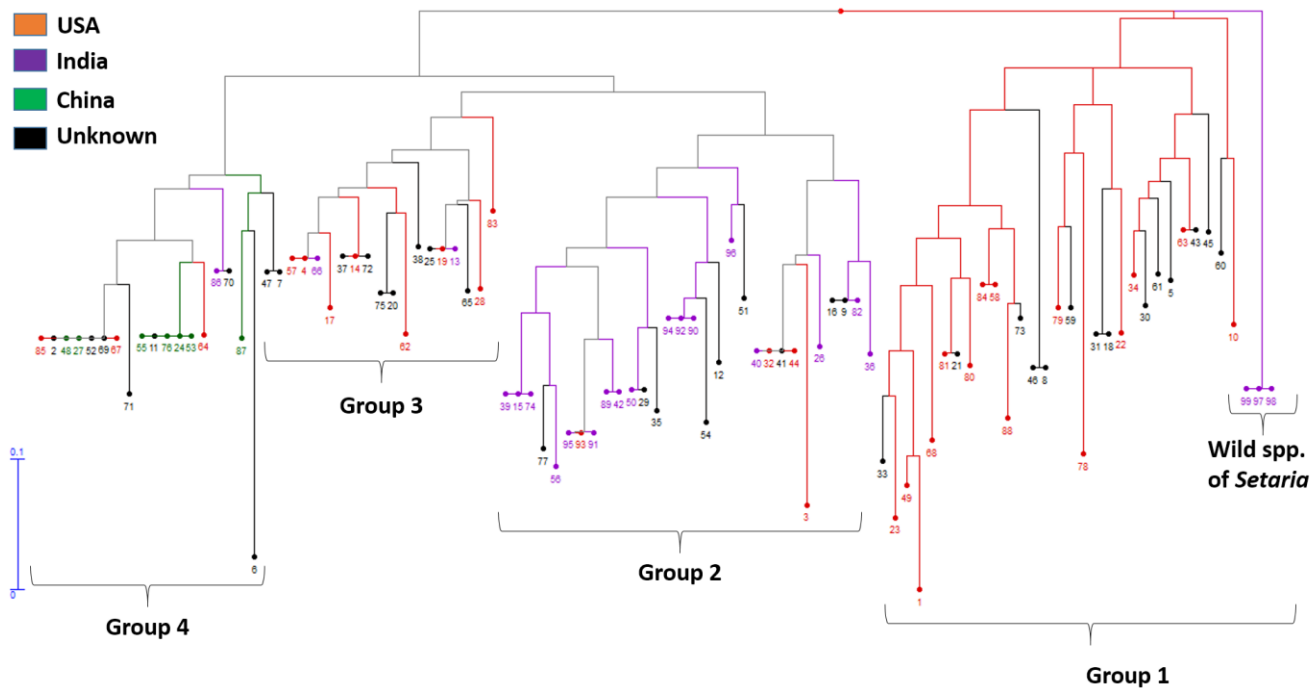

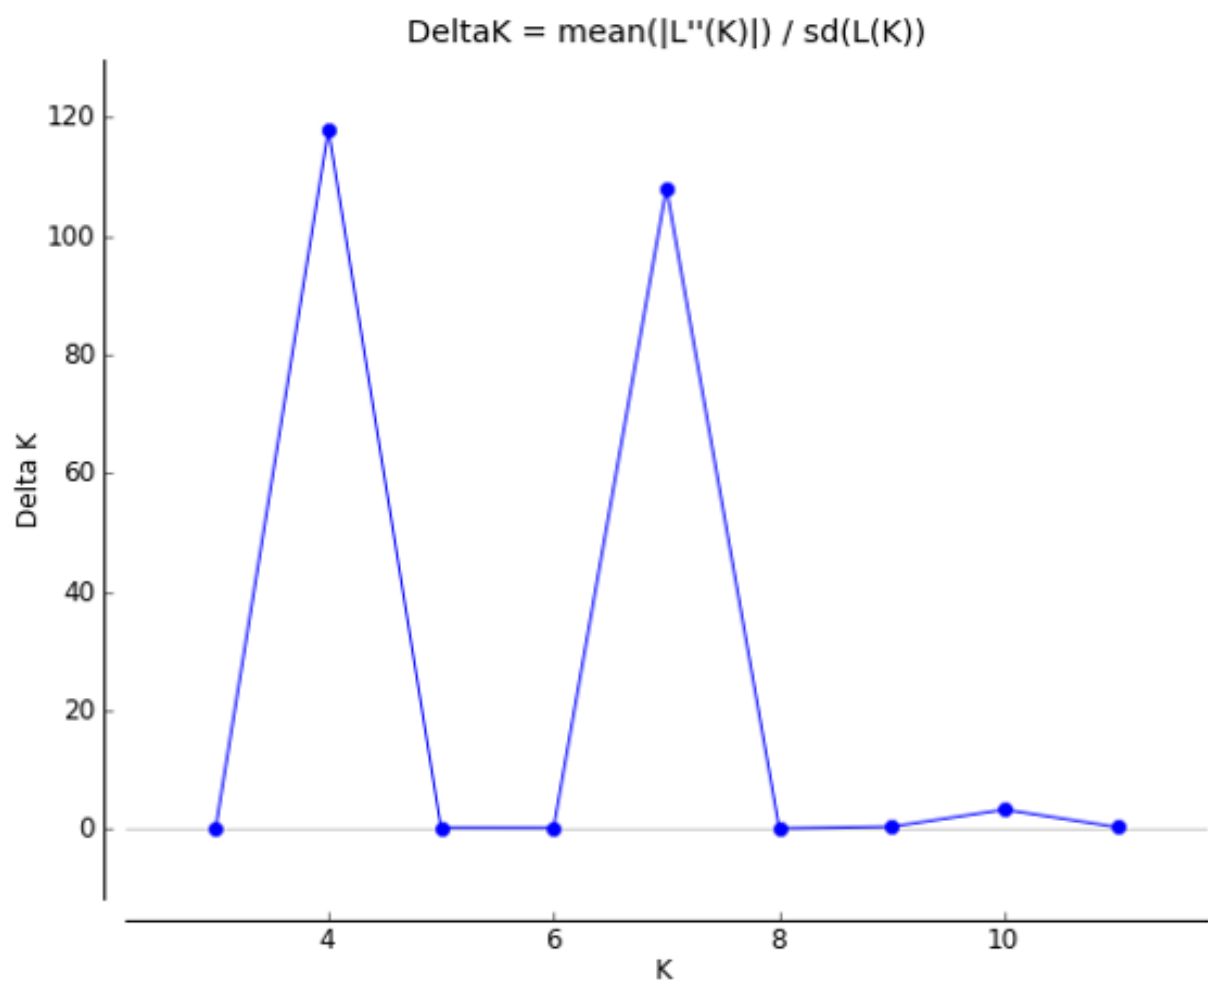

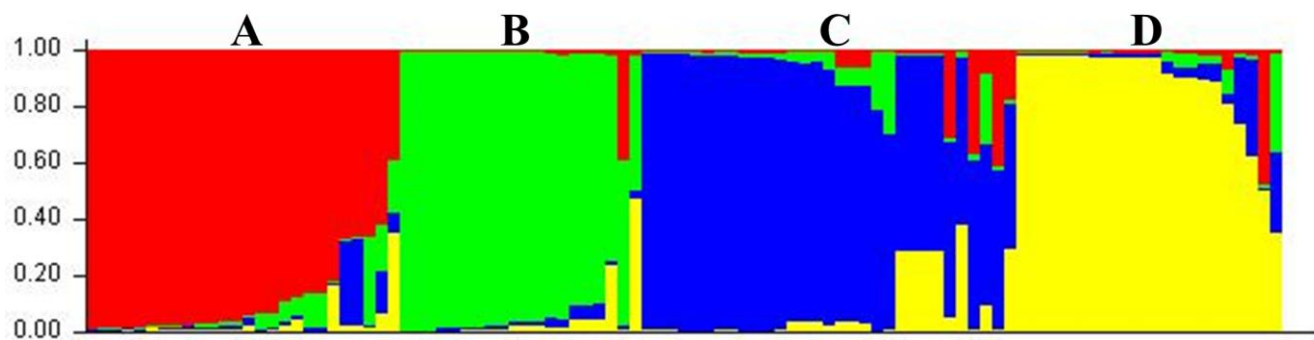

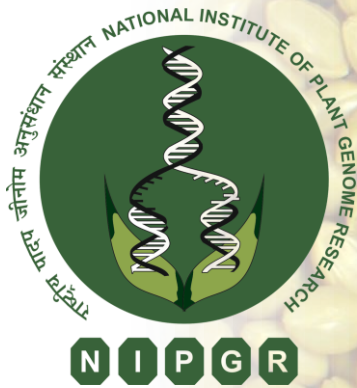

# TUTORIAL

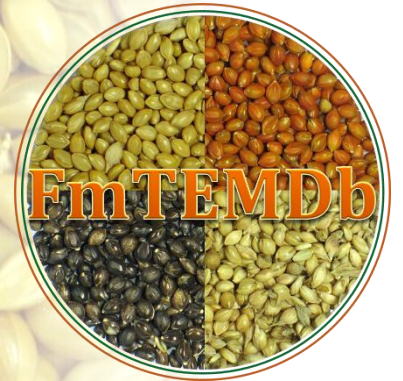

# HOME PAGE

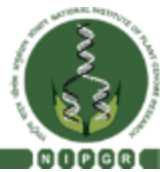

## FOXTAIL MILLET TRANSPOSABLE ELEMENTS-BASED MARKER DATABASE

[Home](#)[Search](#)[Map](#)[Download](#)[Tutorial](#)[References](#)[About Us](#)[Contact us](#)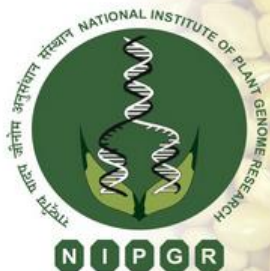

### Foxtail millet Transposable Elements-based Marker Database

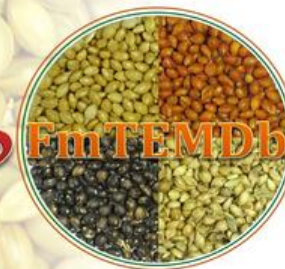

### Welcome to FMTEMDB

Transposable elements (TE) constitute a significant fraction of plant genomes and are considered to be one of the major forces driving genome evolution. TEs have capability to change its position in the genome and called as “jumping gene” by Barbara McClintock, a renowned geneticist. Each transposition event generates new variability by creating mutations and altering cell’s genome size. Retrotransposons are the class I elements which produce RNA intermediates and by the action of reverse transcriptase, they are copied into DNA and then inserted into new locations within the genome, while other TEs class II TEs, or DNA transposons move directly by a “cut and paste” mechanism. Activation of TEs in genomes generate a range of effects, including evolution, structural and functional alterations in gene expression, gene deletion and insertion. Therefore, inactivation of TEs can be crucial for the survival of the host organisms.

Foxtail millet (*Setaria italica* L.), the second largest cultivated millet species has been recently considered to be a tractable model crop for studying functional genomics, as it possesses a small genome (~515 Mb), short life-cycle, rich genetic diversity (~6,000 varieties), inbreeding nature and closely-related to several bioenergy grasses. Recently, the draft genome sequence was released by US Department of Energy Joint Genome Initiative and

# NAVIGATION BAR



## FOXTAIL MILLET TRANSPOSABLE ELEMENTS-BASED MARKER DATABASE

Home

Search

Map

Download

Tutorial

References

About Us

Contact us

Displays homepage

Browse through the database

Displays the interactive physical map

Download the complete data

Selected references for further reading



# 'SEARCH' TAB



## Search By:

TE ID:    eg: dna7423

OR

## Search By:

TE Type:    eg: Copia

OR

## Search By:

Primer Type    eg: RJM

OR

## Search By:

Chromosome:    eg: Fm03

OR

## Search By:

Chromosome:   
Between: Start:  End:    eg: Fm05, 10000 & 1000000

OR

## Search By:

TE Family:   
Chromosome:   
Between: Start:  End:    eg: Copia, Fm05, 890320, 13086892

***The 'SEARCH' tab provides the user a wide-range of search features including searching by chromosome, type of TE, type of primer, ID of TE, chromosomal location and TE family etc.***

# 'SEARCH BY TE ID'

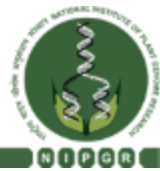

*Search By:*

TE ID:    eg: dna7423

*Search By:*

TE Type:

*Search By:*

Primer Type

*Search By:*

Chromosome:

OR

*Search By:*

Chromosome:

Between: Start:  End:    eg: Fm05, 10000 & 1000000

OR

*Search By:*

TE Family:

Chromosome:

Between: Start:  End:    eg: Copia, Fm05, 890320, 13086892

## Transposon Details:

|            |          |                   |                      |
|------------|----------|-------------------|----------------------|
| TE ID      | dna7423  | TE Type           | DNA/CMC-EnSpm        |
| Chromosome | Fm03     | Start             | 50471905             |
| End        | 50472629 | Score             | 5                    |
| Strand     | -        | Physical Position | <a href="#">View</a> |
| Get        | Primers  |                   |                      |

# 'SEARCH BY TE ID'



Search By:

TE ID:    eg: dna7423

Search By:

TE Type:

Search By:

Primer Type:

Search By:

Chromosome:

OR

Search By:

Chromosome:

Between:

## Transposon Details:

|            |                         |                   |                      |
|------------|-------------------------|-------------------|----------------------|
| TE ID      | dna7423                 | TE Type           | DNA/CMC-EnSpm        |
| Chromosome | Fm03                    | Start             | 50471905             |
| End        | 50472629                | Score             | 5                    |
| Strand     | -                       | Physical Position | <a href="#">View</a> |
| Get        | <a href="#">Primers</a> |                   |                      |

## Primers Details: Part-I TE ID: dna1039

| Primer Type | Junction | TE Type                           | TE Source     | Orientation | Primer Start | Primer Len | Tm <sup>0</sup> C | GC% |
|-------------|----------|-----------------------------------|---------------|-------------|--------------|------------|-------------------|-----|
| ISBP        | 938      | DNA transposon-TIR-CACTA, Unknown | trep_complete | FORWARD     | 899          | 20         | 59.93             | 50  |

## Primers Details: Part-II TE ID: dna1039

| Primer Seq           | Junctiona_spanning_loc | Insertion_type | Product_size | Primer_type | Junction | TE_Type                           | TE_source     | Orientation |
|----------------------|------------------------|----------------|--------------|-------------|----------|-----------------------------------|---------------|-------------|
| GAGAAACCTTGGTATGCCCA | 0                      | Fragment       | 317          | ISBP        | 938      | DNA transposon-TIR-CACTA, Unknown | trep_complete | REVERSE     |

## Primers Details: Part-III TE ID: dna1039

| Start_primer | Primer_Len | Tm <sup>0</sup> C | GC% | Primer_Seq           | Junctiona_spanning_loc2 | Insertion_type |
|--------------|------------|-------------------|-----|----------------------|-------------------------|----------------|
| 1215         | 20         | 60.11             | 45  | TCCGTGTAGCAAATGTGGAA | 0                       | Fragment       |

# 'SEARCH BY TE ID'



Search By:

TE ID:    eg: dna7423

Search By:

TE Type:

Search By:

Primer Type:

Search By:

Chromosome:

OR

Search By:

Chromosome:

Between:

## Transposon Details:

|            |                         |                   |                      |
|------------|-------------------------|-------------------|----------------------|
| TE ID      | dna7423                 | TE Type           | DNA/CMC-EnSpm        |
| Chromosome | Fm03                    | Start             | 50471905             |
| End        | 50472629                | Score             | 5                    |
| Strand     | -                       | Physical Position | <a href="#">View</a> |
| Get        | <a href="#">Primers</a> |                   |                      |

## Primers Details: Part-I TE ID: dna1039

| Primer Type | Junction | TE Type                           | TE Source     | Orientation | Primer Start | Primer Len | Tm <sup>0</sup> C | GC% |
|-------------|----------|-----------------------------------|---------------|-------------|--------------|------------|-------------------|-----|
| ISBP        | 938      | DNA transposon-TIR-CACTA, Unknown | trep_complete | FORWARD     | 899          | 20         | 59.93             | 50  |

## Primers Details: Part-II TE ID: dna1039

| Primer Seq           | Junctiona_spanning_loc | Insertion_type | Product_size | Primer_type | Junction | TE_Type                           | TE_source     | Orientation |
|----------------------|------------------------|----------------|--------------|-------------|----------|-----------------------------------|---------------|-------------|
| GAGAAACCTTGGTATGCCCA | 0                      | Fragment       | 317          | ISBP        | 938      | DNA transposon-TIR-CACTA, Unknown | trep_complete | REVERSE     |

## Primers Details: Part-III TE ID: dna1039

| Start_primer | Primer_Len | Tm <sup>0</sup> C | GC% | Primer_Seq           | Junctiona_spanning_loc2 | Insertion_type |
|--------------|------------|-------------------|-----|----------------------|-------------------------|----------------|
| 1215         | 20         | 60.11             | 45  | TCCGTGTAGCAAATGTGGAA | 0                       | Fragment       |

Reference  
foxtail millet  
TEMap

Fm01  
[34211]

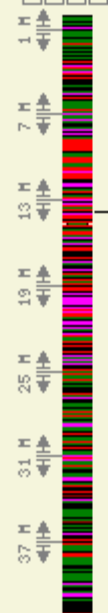

- Mag +  
1-42,100,000 bp

# 'SEARCH BY TE TYPE'



Search By:

TE ID:

Submit

Reset

eg: dna7423

OR

Search By:

TE Type:

Submit

Reset

eg: Copia

OR

Search By:

Primer Type

Submit

OR

Search By:

Chromosome:

Submit

OR

Search By:

Chromosome:

Between: Start:  End:

Submit

Reset

eg: Fm05, 10000 & 1000000

OR

Search By:

TE Family:

Chromosome:

Between: Start:  End:

Submit

Reset

eg: Copia, Fm05, 890320, 13086892

TE Type: Copia Total TEs found: 1038

| TE Type | TE ID    | Get                          |
|---------|----------|------------------------------|
| Copia   | copia235 | <a href="#">More Details</a> |
| Copia   | copia236 | <a href="#">More Details</a> |
| Copia   | copia237 | <a href="#">More Details</a> |
| Copia   | copia250 | <a href="#">More Details</a> |
| Copia   | copia251 | <a href="#">More Details</a> |
| Copia   | copia252 | <a href="#">More Details</a> |
| Copia   | copia253 | <a href="#">More Details</a> |
| Copia   | copia254 | <a href="#">More Details</a> |
| Copia   | copia255 | <a href="#">More Details</a> |
| Copia   | copia256 | <a href="#">More Details</a> |
| Copia   | copia257 | <a href="#">More Details</a> |

# 'SEARCH BY TE TYPE'



Search By:

TE ID:    eg: dna7423

OR

Search By:

TE Type:    eg: Copia

OR

Search By:

Primer Type

OR

Search By:

Chromosome:

OR

Search By:

Chromosome:

Between: Start:  End:    eg: Fm05

OR

TE Type: Copia Total TEs found: 1038

| TE Type | TE ID    | Get                          |
|---------|----------|------------------------------|
| Copia   | copia235 | <a href="#">More Details</a> |
| Copia   | copia236 | <a href="#">More Details</a> |
| Copia   | copia237 | <a href="#">More Details</a> |
| Copia   | copia250 | <a href="#">More Details</a> |
| Copia   | copia251 | <a href="#">More Details</a> |
| Copia   | copia252 | <a href="#">More Details</a> |
| Copia   | copia253 | <a href="#">More Details</a> |
| Copia   | copia254 | <a href="#">More Details</a> |
| Copia   | copia255 | <a href="#">More Details</a> |
| Copia   | copia256 | <a href="#">More Details</a> |
| Copia   | copia257 | <a href="#">More Details</a> |

## Copia Details:

|                   |                         |                       |          |
|-------------------|-------------------------|-----------------------|----------|
| TE ID             | copia256                | Chromosome            | Fm03     |
| Start             | 16160283                | End                   | 16166976 |
| Strand            | +                       | Score                 | 6694     |
| Physical Position | <a href="#">View</a>    | LTR Region Similarity | 6        |
| 5' -LTR Start     | 2147483647              | 5' -LTR End           | 16160283 |
| 5' -LTR Length    | 16160720                | 3' -LTR Start         | 438      |
| 3' -LTR Length    | 16166525                | 3' -LTR Length        | 16166976 |
| Get               | <a href="#">Primers</a> |                       |          |

# 'SEARCH BY TE TYPE'

| Copia Details:    |                         |               |      |
|-------------------|-------------------------|---------------|------|
| TE ID             | copia256                | Chromosome    | Fw03 |
| Start             | 16160283                | End           |      |
| Strand            | +                       | Score         |      |
| Physical Position | <a href="#">View</a>    |               |      |
| 5'-LTR Start      | 2147483647              | 5'-LTR        |      |
| 5'-LTR Length     | 16160720                | 3'-LTR        |      |
| 3'-LTR Length     | 16166525                | 3'-LTR Length |      |
| Get               | <a href="#">Primers</a> |               |      |

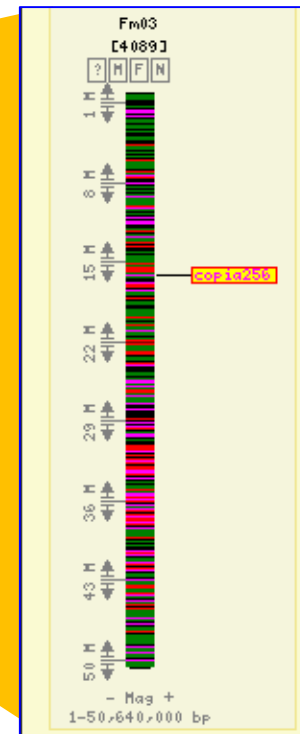

# 'SEARCH BY TE TYPE'



| Copia Details:    |                         |               |      |
|-------------------|-------------------------|---------------|------|
| TE ID             | copia256                | Chromosome    | Fm03 |
| Start             | 16160283                | End           |      |
| Strand            | +                       | Score         |      |
| Physical Position | <a href="#">View</a>    |               |      |
| 5'-LTR Start      | 2147483647              | 5'-LTR        |      |
| 5'-LTR Length     | 16160720                | 3'-LTR        |      |
| 3'-LTR Length     | 16166525                | 3'-LTR Length |      |
| Get               | <a href="#">Primers</a> |               |      |

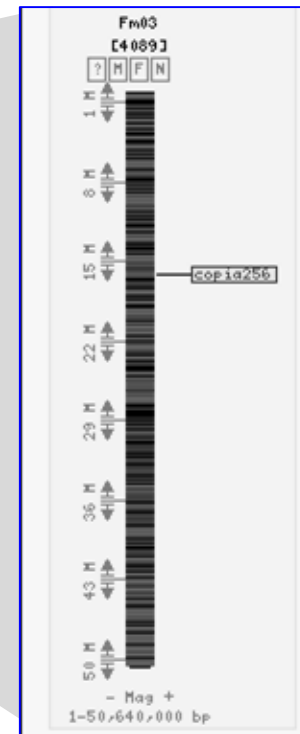

## Primers Details: Part-I TE ID: copia256

| Primer No | Primer Type | Junction | TE Type | TE Source | Orientation | Primer Start | Primer Len | Tm <sup>0</sup> C | GC% |
|-----------|-------------|----------|---------|-----------|-------------|--------------|------------|-------------------|-----|
| 1         | ISBP        | 2688     |         |           | FORWARD     | 2297         | 20         | 59.78             | 50  |

## Primers Details: Part-II TE ID: copia256

| Primer Seq           | Junctiona_spanning_loc | Insertion_type | Product_size | Primer_type | Junction | TE_Type | TE_source | Orientation |
|----------------------|------------------------|----------------|--------------|-------------|----------|---------|-----------|-------------|
| GAAGCCAATGGATCTTGAGC | 0                      | Fragment       | 470          | ISBP        | 2688     |         |           | REVERSE     |

## Primers Details: Part-III TE ID: copia256

| Start_primer | Primer_Len | Tm <sup>0</sup> C | GC% | Primer_Seq           | Junctiona_spanning_loc2 | Insertion_type |
|--------------|------------|-------------------|-----|----------------------|-------------------------|----------------|
| 2766         | 20         | 59.88             | 40  | TTGCAACATGAACAGTTGCA | 0                       | Fragment       |



# 'SEARCH BY PRIMER TYPE'



Search By:

TE ID:

eg: dna7423

OR

Search By:

TE Type:

eg: Copia

OR

Search By:

Primer Type

eg: RJM

OR

Search By:

Primers Type Details: **RJM** Total Found: **712**

| TE ID     | Primer Type | TE Type | Get                          |
|-----------|-------------|---------|------------------------------|
| copia1000 | RJM         | Copia   | <a href="#">More Details</a> |
| copia1004 | RJM         | Copia   | <a href="#">More Details</a> |
| copia1008 | RJM         | Copia   | <a href="#">More Details</a> |
| copia1009 | RJM         | Copia   | <a href="#">More Details</a> |
| copia1010 | RJM         | Copia   | <a href="#">More Details</a> |
| copia1012 | RJM         | Copia   | <a href="#">More Details</a> |
| copia1013 | RJM         | Copia   | <a href="#">More Details</a> |
| copia1015 | RJM         | Copia   | <a href="#">More Details</a> |

# 'SEARCH BY PRIMER TYPE'



Search By:

TE ID:    eg: dna7423

OR

Search By:

TE Type:    eg: Copia

OR

Search By:

Primer Type    eg: RJM

OR

Search By:

Primers Type Details: RJM Total Found:712

| TE ID     | Primer Type | TE Type | Get                          |
|-----------|-------------|---------|------------------------------|
| copia1000 | RJM         | Copia   | <a href="#">More Details</a> |
| copia1004 | RJM         | Copia   | <a href="#">More Details</a> |
| copia1008 | RJM         |         | <a href="#">More Details</a> |
| copia1009 |             |         | <a href="#">More Details</a> |

Copia Details:

|                   |                         |                       |          |
|-------------------|-------------------------|-----------------------|----------|
| TE ID             | copia1000               | Chromosome            | Fm09     |
| Start             | 32740008                | End                   | 32748171 |
| Strand            | +                       | Score                 | 8164     |
| Physical Position | <a href="#">View</a>    | LTR Region Similarity | 6        |
| 5`-LTR Start      | 2147483647              | 5`-LTR End            | 32740008 |
| 5`-LTR Length     | 32741408                | 3`-LTR Start          | 1401     |
| 3`-LTR Length     | 32746771                | 3`-LTR Length         | 32748171 |
| Get               | <a href="#">Primers</a> |                       |          |

# 'SEARCH BY PRIMER TYPE'



## Copia Details:

|                   |                         |               |  |
|-------------------|-------------------------|---------------|--|
| TE ID             | copia1000               | Chromosome    |  |
| Start             | 32740008                | End           |  |
| Strand            | +                       | Score         |  |
| Physical Position | <a href="#">View</a>    |               |  |
| 5' -LTR Start     | 2147483647              | 5' -LTR End   |  |
| 5' -LTR Length    | 32741408                | 3' -LTR Start |  |
| 3' -LTR Length    | 32746771                | 3' -LTR End   |  |
| Get               | <a href="#">Primers</a> |               |  |

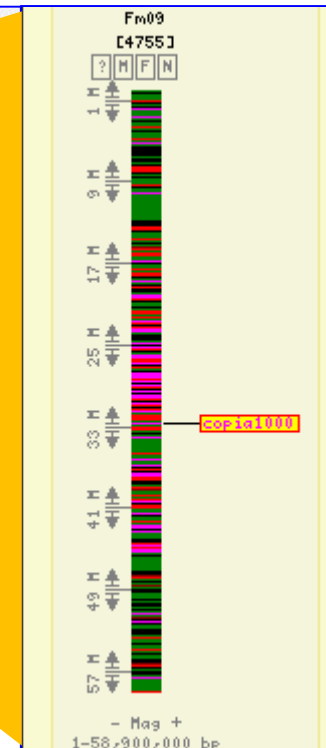

# 'SEARCH BY PRIMER TYPE'



## Copia Details:

|                   |                         |              |  |
|-------------------|-------------------------|--------------|--|
| TE ID             | copia1000               | Chromosome   |  |
| Start             | 32740008                | End          |  |
| Strand            | +                       | Score        |  |
| Physical Position | <a href="#">View</a>    |              |  |
| 5'-LTR Start      | 2147483647              | 5'-LTR End   |  |
| 5'-LTR Length     | 32741408                | 3'-LTR Start |  |
| 3'-LTR Length     | 32746771                | 3'-LTR End   |  |
| Get               | <a href="#">Primers</a> |              |  |

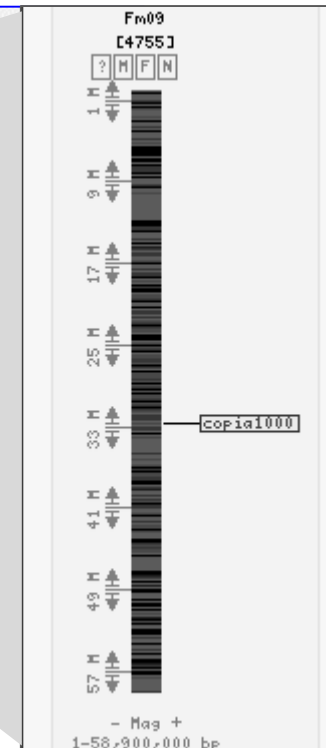

## Primers Details: Part-I TE ID: copia1000

| Primer No | Primer Type | Junction | TE Type                                              | TE Source     | Orientation | Primer Start | Primer Len | Tm <sup>0</sup> C | GC% |
|-----------|-------------|----------|------------------------------------------------------|---------------|-------------|--------------|------------|-------------------|-----|
| 1         | RJM         | 986      | Retrotransposon-LTR-Gypsy, Unknown                   | trep_complete | FORWARD     | 972          | 20         | 62.54             | 55  |
| 2         | RJM         | 1878     | Unknown, Retrotransposon-LTR-Copia                   | trep_complete | FORWARD     | 1680         | 20         | 59.97             | 50  |
| 3         | RJM         | 2848     | Unknown, Retrotransposon-LTR-Copia                   | trep_complete | FORWARD     | 2193         | 19         | 60.76             | 58  |
| 4         | RJM         | 2958     | Retrotransposon-LTR-Copia, Retrotransposon-LTR-Copia | trep_complete | FORWARD     | 2724         | 20         | 61.04             | 55  |
| 5         | RJM         | 4036     | Retrotransposon-LTR-Copia, Unknown                   | trep_complete | FORWARD     | 4021         | 21         | 60.04             | 48  |
| 6         | RJM         | 4036     | Retrotransposon-LTR-Copia, Retrotransposon-LTR-Copia |               | FORWARD     | 3830         | 20         | 59.81             | 50  |
| 1         | ISBP        | 986      | Retrotransposon-LTR-Gypsy, Unknown                   | trep_complete | FORWARD     | 935          | 20         | 60.11             | 50  |
| 2         | ISBP        | 1375     | Retrotransposon-LTR-Gypsy, Retrotransposon-LTR-Copia | trep_complete | FORWARD     | 721          | 20         | 60.21             | 50  |

# 'SEARCH BY CHROMOSOME'



Search By:

TE ID:    eg: dna7423  
OR

Search By:

TE Type:    eg: Copia  
OR

Search By:

Primer Type:    eg: RJM  
OR

Search By:

Chromosome:    eg: Fm03  
OR

Search By:

Chromosome:   
Between: Start:  End:    
OR

Search By:

TE Family:   
Chromosome:   
Between: Start:  End:

Chromosome: Fm03 Total TEs found: 4089

| TE Type | TE ID    | Get                          |
|---------|----------|------------------------------|
| Copia   | copia235 | <a href="#">More Details</a> |
| Copia   | copia236 | <a href="#">More Details</a> |
| Copia   | copia237 | <a href="#">More Details</a> |
| Copia   | copia250 | <a href="#">More Details</a> |
| Copia   | copia251 | <a href="#">More Details</a> |
| Copia   | copia252 | <a href="#">More Details</a> |
| Copia   | copia253 | <a href="#">More Details</a> |
| Copia   | copia254 | <a href="#">More Details</a> |
| Copia   | copia255 | <a href="#">More Details</a> |
| Copia   | copia256 | <a href="#">More Details</a> |
| Copia   | copia257 | <a href="#">More Details</a> |

# 'SEARCH BY CHROMOSOME'



Search By:

TE ID:    eg: dna7423  
OR

Search By:

TE Type:    eg: Copia  
OR

Search By:

Primer Type:    eg: RJM  
OR

Search By:

Chromosome:    eg: Fm03  
OR

Search By:

Chromosome:   
Between: Start:  End:    
OR

Search By:

TE Family:   
Chromosome:   
Between: Start:  End:

Chromosome: Fm03 Total TEs found: 4089

| TE Type | TE ID    | Get                          |
|---------|----------|------------------------------|
| Copia   | copia235 | <a href="#">More Details</a> |
| Copia   | copia236 | <a href="#">More Details</a> |
| Copia   | copia237 | <a href="#">More Details</a> |
| Copia   | copia250 | <a href="#">More Details</a> |
| Copia   | copia251 | <a href="#">More Details</a> |
| Copia   | copia252 | <a href="#">More Details</a> |
| Copia   | copia253 | <a href="#">More Details</a> |
| Copia   | copia254 | <a href="#">More Details</a> |
| Copia   | copia255 | <a href="#">More Details</a> |
| Copia   | copia256 | <a href="#">More Details</a> |
| Copia   | copia257 | <a href="#">More Details</a> |

## Copia Details:

|                   |                         |                       |          |
|-------------------|-------------------------|-----------------------|----------|
| TE ID             | copia256                | Chromosome            | Fm03     |
| Start             | 16160283                | End                   | 16166976 |
| Strand            | +                       | Score                 | 6694     |
| Physical Position | <a href="#">View</a>    | LTR Region Similarity | 6        |
| 5'-LTR Start      | 2147483647              | 5'-LTR End            | 16160283 |
| 5'-LTR Length     | 16160720                | 3'-LTR Start          | 438      |
| 3'-LTR Length     | 16166525                | 3'-LTR Length         | 16166976 |
| Get               | <a href="#">Primers</a> |                       |          |

# 'SEARCH BY CHROMOSOME'

Copia Details:

|                   |                         |               |      |
|-------------------|-------------------------|---------------|------|
| TE ID             | copia256                | Chromosome    | Fm03 |
| Start             | 16160283                | End           |      |
| Strand            | +                       | Score         |      |
| Physical Position | <a href="#">View</a>    |               |      |
| 5'-LTR Start      | 2147483647              | 5'-LTR        |      |
| 5'-LTR Length     | 16160720                | 3'-LTR Start  |      |
| 3'-LTR Length     | 16166525                | 3'-LTR Length |      |
| Get               | <a href="#">Primers</a> |               |      |

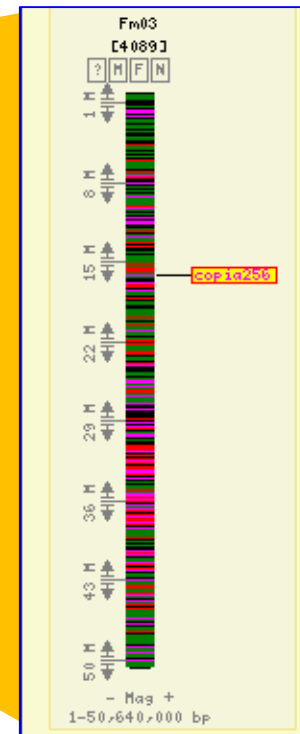

# 'SEARCH BY PRIMER TYPE'



## Copia Details:

|                   |                         |              |  |
|-------------------|-------------------------|--------------|--|
| TE ID             | copia1000               | Chromosome   |  |
| Start             | 32740008                | End          |  |
| Strand            | +                       | Score        |  |
| Physical Position | <a href="#">View</a>    |              |  |
| 5'-LTR Start      | 2147483647              | 5'-LTR End   |  |
| 5'-LTR Length     | 32741408                | 3'-LTR Start |  |
| 3'-LTR Length     | 32746771                | 3'-LTR End   |  |
| Get               | <a href="#">Primers</a> |              |  |

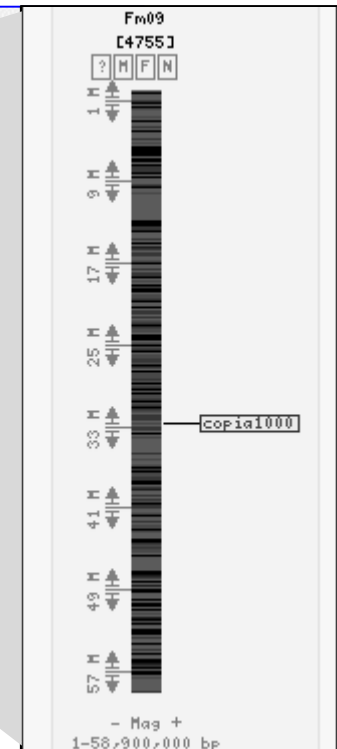

## Primers Details: Part-I TE ID: copia1000

| Primer No | Primer Type | Junction | TE Type                                              | TE Source     | Orientation | Primer Start | Primer Len | Tm <sup>0</sup> C | GC% |
|-----------|-------------|----------|------------------------------------------------------|---------------|-------------|--------------|------------|-------------------|-----|
| 1         | RJM         | 986      | Retrotransposon-LTR-Gypsy, Unknown                   | trep_complete | FORWARD     | 972          | 20         | 62.54             | 55  |
| 2         | RJM         | 1878     | Unknown, Retrotransposon-LTR-Copia                   | trep_complete | FORWARD     | 1680         | 20         | 59.97             | 50  |
| 3         | RJM         | 2848     | Unknown, Retrotransposon-LTR-Copia                   | trep_complete | FORWARD     | 2193         | 19         | 60.76             | 58  |
| 4         | RJM         | 2958     | Retrotransposon-LTR-Copia, Retrotransposon-LTR-Copia | trep_complete | FORWARD     | 2724         | 20         | 61.04             | 55  |
| 5         | RJM         | 4036     | Retrotransposon-LTR-Copia, Unknown                   | trep_complete | FORWARD     | 4021         | 21         | 60.04             | 48  |
| 6         | RJM         | 4036     | Retrotransposon-LTR-Copia, Retrotransposon-LTR-Copia |               | FORWARD     | 3830         | 20         | 59.81             | 50  |
| 1         | ISBP        | 986      | Retrotransposon-LTR-Gypsy, Unknown                   | trep_complete | FORWARD     | 935          | 20         | 60.11             | 50  |
| 2         | ISBP        | 1375     | Retrotransposon-LTR-Gypsy, Retrotransposon-LTR-Copia | trep_complete | FORWARD     | 721          | 20         | 60.21             | 50  |



# 'MAP' OPTION

Map-I: TE Type wise

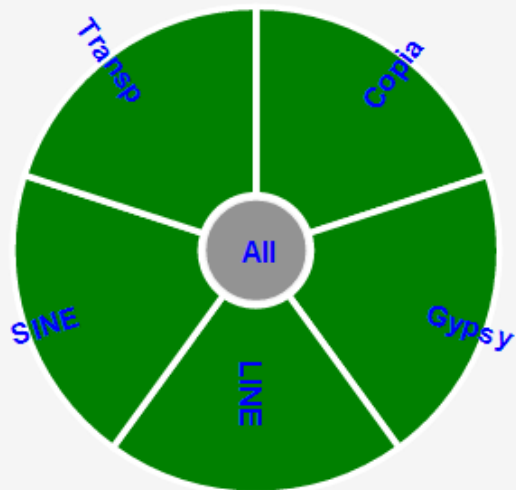

Map-II: Chromosome wise

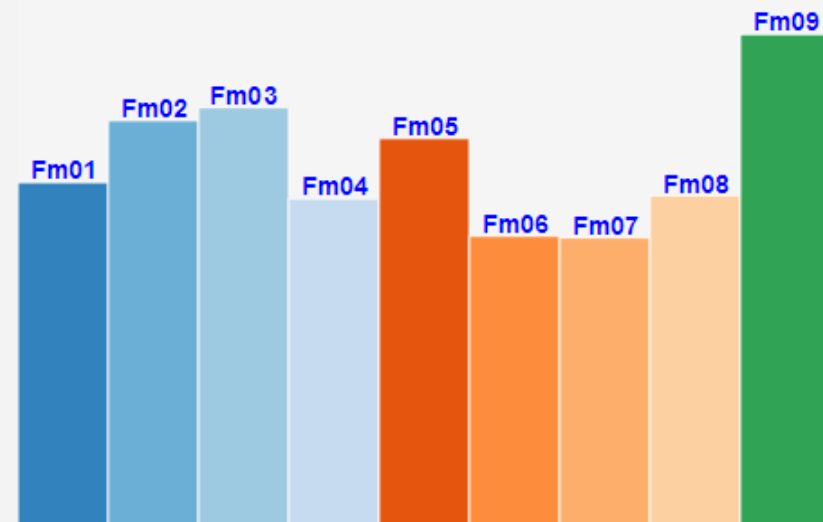

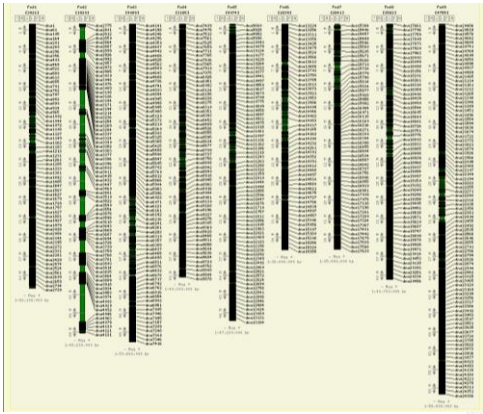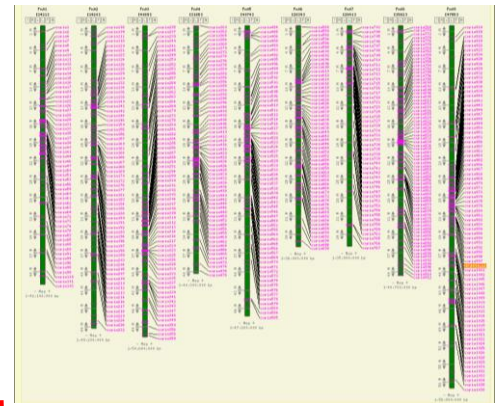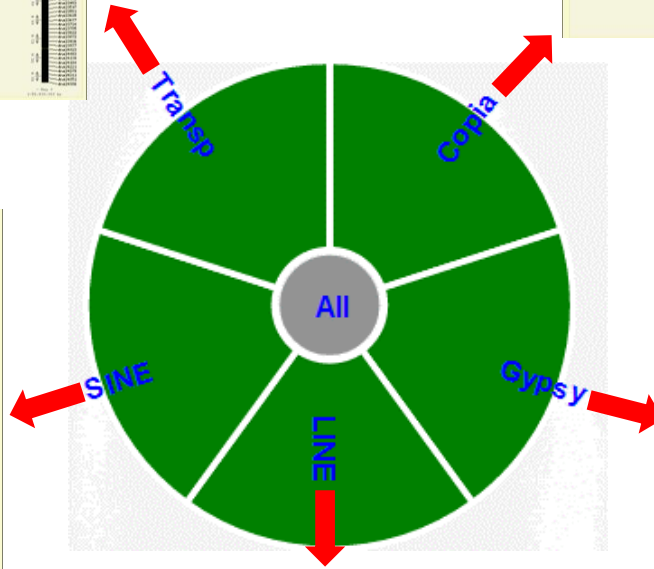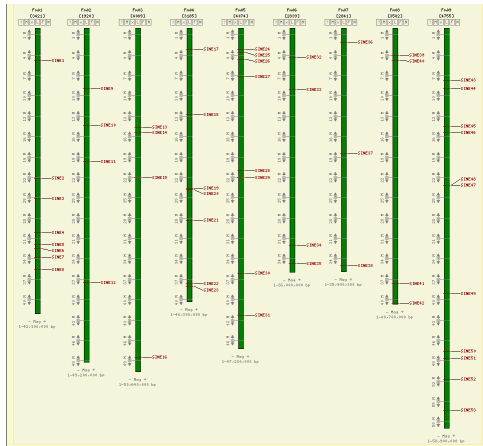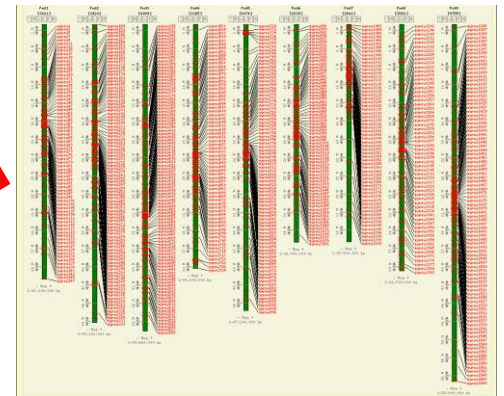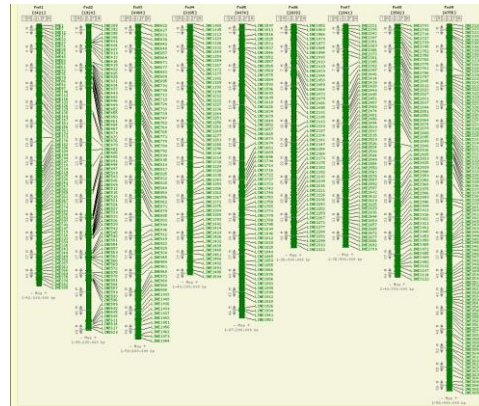

# HOW TO VIEW THE DETAILS

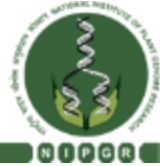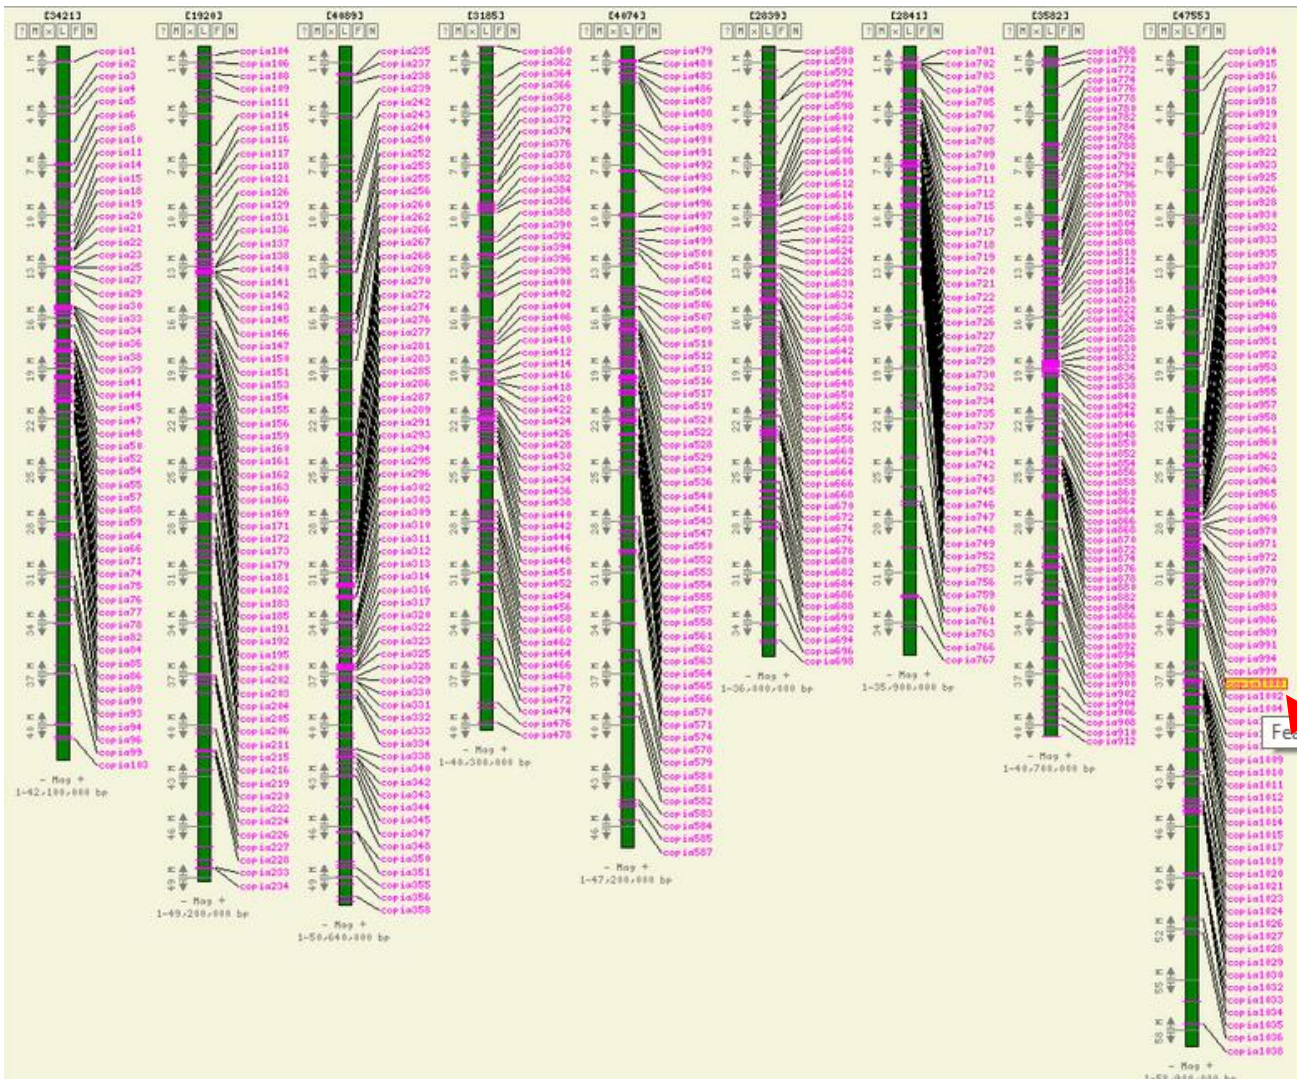

Feature Details: copia1000 [copia1000]

**CLICK ON THE TE OF INTEREST**

# HOW TO VIEW THE DETAILS

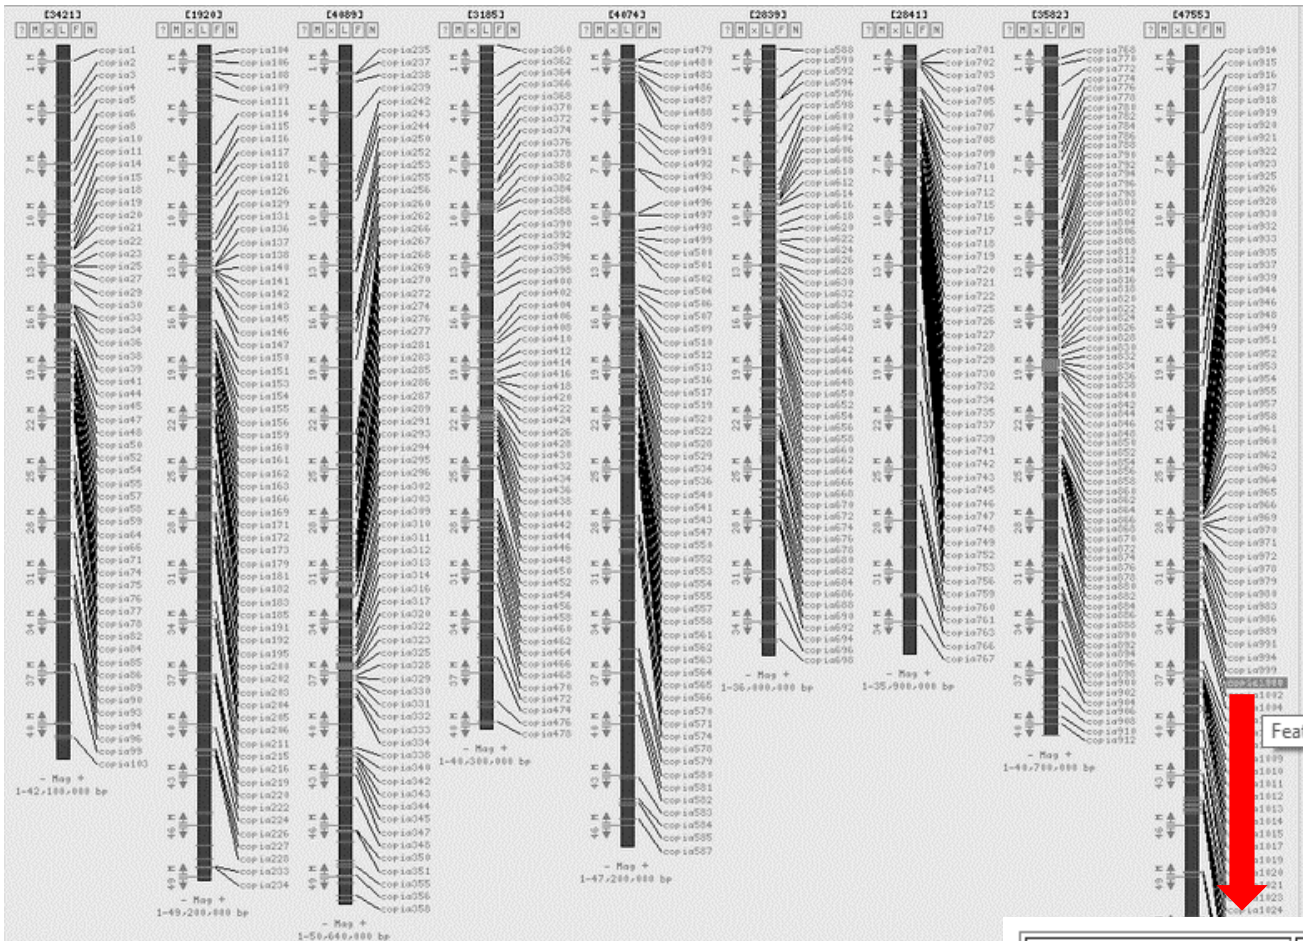

Feature Details: copia1000 [copia1000]

|              |                              |
|--------------|------------------------------|
| <b>Name:</b> | copia1000                    |
| <b>View:</b> | on Map                       |
| <b>View:</b> | <a href="#">More Details</a> |

# VIEWING THE DETAILS



|       |                              |
|-------|------------------------------|
| Name: | copia1000                    |
| View: | on Map                       |
| View: | <a href="#">More Details</a> |

**Copia Details:**

|                   |                         |            |  |
|-------------------|-------------------------|------------|--|
| TE ID             | copia1000               | Chromosome |  |
| Start             | 32740008                | End        |  |
| Strand            | +                       | Score      |  |
| Physical Position | <a href="#">View</a>    |            |  |
| 5' -LTR Start     | 2147483647              | 5' -LTR    |  |
| 5' -LTR Length    | 32741408                | 3' -LTR    |  |
| 3' -LTR Length    | 32746771                | 3' -LTR Le |  |
| Get               | <a href="#">Primers</a> |            |  |

**Primers Details: Part-I TE ID: copia1000**

| Primer No | Primer Type | Junction | TE Type                                              | TE Source     | Orientation | Primer Start | Primer Len | Tm <sup>0</sup> C | GC% |
|-----------|-------------|----------|------------------------------------------------------|---------------|-------------|--------------|------------|-------------------|-----|
| 1         | RJM         | 986      | Retrotransposon-LTR-Gypsy, Unknown                   | trep_complete | FORWARD     | 972          | 20         | 62.54             | 55  |
| 2         | RJM         | 1878     | Unknown, Retrotransposon-LTR-Copia                   | trep_complete | FORWARD     | 1680         | 20         | 59.97             | 50  |
| 3         | RJM         | 2848     | Unknown, Retrotransposon-LTR-Copia                   | trep_complete | FORWARD     | 2193         | 19         | 60.76             | 58  |
| 4         | RJM         | 2958     | Retrotransposon-LTR-Copia, Retrotransposon-LTR-Copia | trep_complete | FORWARD     | 2724         | 20         | 61.04             | 55  |
| 5         | RJM         | 4036     | Retrotransposon-LTR-Copia, Unknown                   | trep_complete | FORWARD     | 4021         | 21         | 60.04             | 48  |
| 6         | RJM         | 4036     | Retrotransposon-LTR-Copia, Retrotransposon-LTR-Copia |               | FORWARD     | 3830         | 20         | 59.81             | 50  |
| 1         | ISBP        | 986      | Retrotransposon-LTR-Gypsy, Unknown                   | trep_complete | FORWARD     | 935          | 20         | 60.11             | 50  |
| 2         | ISBP        | 1375     | Retrotransposon-LTR-Gypsy, Retrotransposon-LTR-Copia | trep_complete | FORWARD     | 721          | 20         | 60.21             | 50  |



# Comparative map

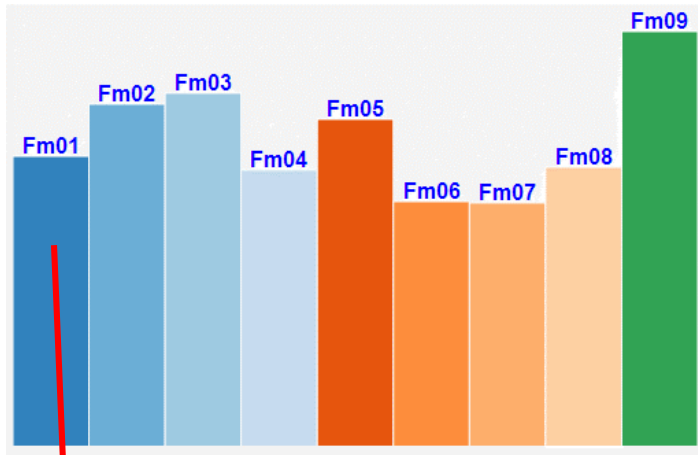

TE-marker based comparative mapping data is available for visualization with sorghum, maize, rice and *Brachypodium*

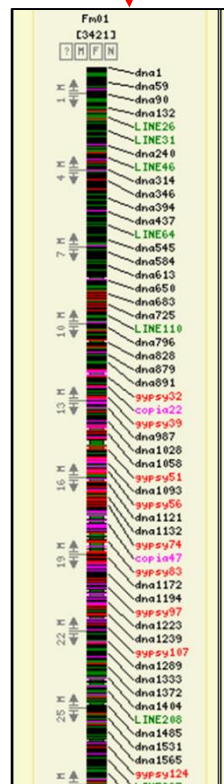

Map Options | Redraw | Reset

| Map Set              | Add Maps Left            | foxtail millet-TEMap (Reference Set) | Add Maps Right |
|----------------------|--------------------------|--------------------------------------|----------------|
| Min. Correspondences |                          |                                      |                |
| Align Vertically     | <input type="checkbox"/> |                                      |                |
| Stack                |                          |                                      |                |
| Maps                 |                          | Fm01                                 |                |
| Start                |                          | 1                                    |                |
| Stop                 |                          | 42100000.00                          |                |
| Magnification        |                          | Original                             |                |
| Flipped              | <input type="checkbox"/> |                                      |                |

hint: To save time, select the desired options before redrawing the map.  
  (Hide Map Menu)

Feature Options  
 Correspondence Options  
 Display Options  
 Advanced Options

Comparative Maps (Right Side)

Add Map Set

No Map Set Selected

Min. Correspondences:

Stack 1

Format:  
 Name [Total correspondences to slot,  
 Max correspondences to single map]

# Comparative map



NIPGR

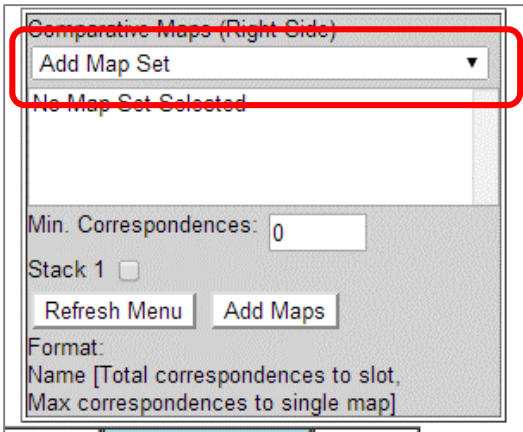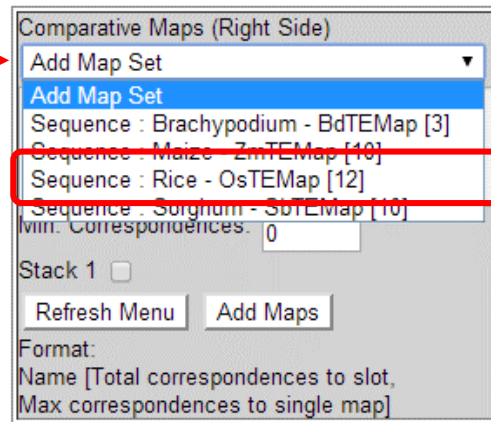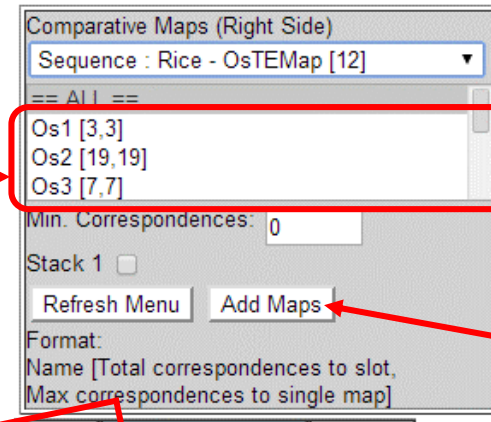

Select the chr. of interest & click 'Add Maps'

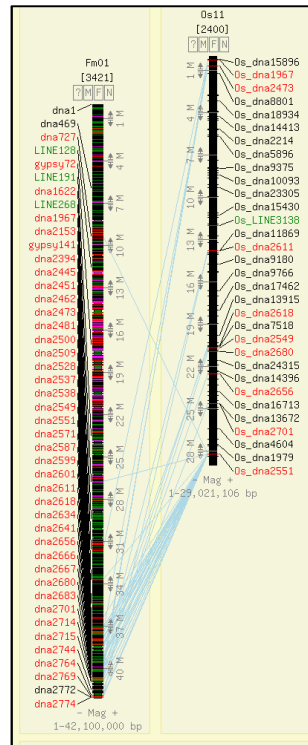

The Syntenic TEs are displayed in RED and the blue lines indicate the orthologs



# Download Data



The complete TE & marker data of foxtail millet are available for download in this section.

| Download Data     |                          |                          |
|-------------------|--------------------------|--------------------------|
| Type of TE        | TE Data                  | Primers                  |
| <b>Copia</b>      | <a href="#">Download</a> | <a href="#">Download</a> |
| <b>Gypsy</b>      | <a href="#">Download</a> | <a href="#">Download</a> |
| <b>LINE</b>       | <a href="#">Download</a> | No Primers               |
| <b>SINE</b>       | <a href="#">Download</a> | No Primers               |
| <b>Transposon</b> | <a href="#">Download</a> | <a href="#">Download</a> |
